# Supplementary material for: Gluteal muscle composition differentiates fallers from non-fallers in community dwelling older adults
Source: PubMed Central journal article supplement (PMC4101852; doi:10.1186/1471-2318-14-37), 2014-03-25
Supplement: 1471-2318-14-37-S1.pdf [file 1471-2318-14-37-S1.pdf]

**Table A1.** Between-gender comparisons in the non-faller and faller groups, on muscle attenuation (*HU*) and normalized IMAT (%).

|                     |      | Non-fallers            |                          | Fallers               |                          |              |
|---------------------|------|------------------------|--------------------------|-----------------------|--------------------------|--------------|
|                     |      | Men<br>( <i>n</i> =21) | Women<br>( <i>n</i> =22) | Men<br>( <i>n</i> =5) | Women<br>( <i>n</i> =10) |              |
| Attenuation (HU)    | PS   | 43.55 ± 1.19           | 42.58 ± 0.99             | PS                    | 39.05 ± 2.66             | 36.05 ± 2.42 |
|                     | GMax | 26.66 ± 1.63           | 23.41 ± 1.64             | GMax                  | 13.13 ± 6.37             | 11.47 ± 4.60 |
|                     | GMm  | 32.12 ± 1.72           | 34.58 ± 1.03             | GMm                   | 31.45 ± 2.90             | 24.88 ± 2.62 |
|                     | VL   | 39.40 ± 1.48           | 37.74 ± 1.12             | VL                    | 33.04 ± 3.61             | 32.21 ± 2.70 |
|                     | RF   | 46.66 ± 0.89           | 44.29 ± 0.99             | RF                    | 41.09 ± 2.42             | 44.00 ± 1.66 |
|                     | Ham  | 41.10 ± 1.62           | 40.68 ± 1.42             | Ham                   | 39.07 ± 3.31             | 40.66 ± 2.34 |
|                     | Add  | 37.13 ± 1.34           | 36.49 ± 1.09             | Add                   | 35.14 ± 3.29             | 30.97 ± 1.87 |
| Normalized IMAT (%) | PS   | 7.52 ± 1.58            | 3.28 ± 0.43 *            | PS                    | 7.90 ± 2.28              | 9.07 ± 1.51  |
|                     | GMax | 10.13 ± 1.64           | 10.04 ± 1.00             | GMax                  | 18.55 ± 4.06             | 20.35 ± 3.71 |
|                     | GMm  | 10.33 ± 1.52           | 7.43 ± 0.60              | GMm                   | 11.56 ± 2.47             | 13.70 ± 2.53 |
|                     | VL   | 1.09 ± 0.34            | 1.85 ± 0.43 *            | VL                    | 2.13 ± 0.40              | 2.80 ± 1.08  |
|                     | RF   | 0.31 ± 0.08            | 0.67 ± 0.14              | RF                    | 1.22 ± 0.61              | 0.90 ± 0.25  |
|                     | Ham  | 3.44 ± 0.69            | 2.84 ± 0.34              | Ham                   | 3.71 ± 0.85              | 5.50 ± 1.37  |
|                     | Add  | 1.78 ± 0.49            | 1.60 ± 0.30              | Add                   | 2.51 ± 0.83              | 4.23 ± 1.30  |

Data is expressed as Mean ± SEM. PS: psoas; GMax: gluteus maximus; GMm: gluteus medius/minimus; VL: vastus lateralis; RF: rectus femoris; Ham: hamstrings; Add: adductor magnus/longus. \* indicates significant difference (*p* < 0.05).
