# Supplementary material for: Gluteal muscle composition differentiates fallers from non-fallers in community dwelling older adults
Source: PubMed Central journal article supplement (PMC4101852; doi:10.1186/1471-2318-14-37), 2014-03-25
Supplement: 1471-2318-14-37-S2.pdf [file 1471-2318-14-37-S2.pdf]

**Table A2.** Between-muscle comparisons in the non-faller and faller groups, on muscle attenuation (*HU*) and normalized IMAT (%).

|                            |      | Non-fallers |    |    |     |     |      |      | Fallers |    |    |     |     |      |      |
|----------------------------|------|-------------|----|----|-----|-----|------|------|---------|----|----|-----|-----|------|------|
|                            |      | RF          | PS | VL | Add | Ham | Gmed | Gmax | RF      | PS | VL | Add | Ham | Gmed | Gmax |
| Muscle Attenuation<br>(HU) | RF   |             |    | *  | *   | *   | *    | *    |         |    | *  | *   |     | *    | *    |
|                            | PS   |             |    | *  | *   |     | *    | *    |         |    |    |     |     | *    | *    |
|                            | VL   | *           | *  |    |     |     | *    | *    | *       |    |    |     |     |      | *    |
|                            | Add  | *           | *  |    |     |     |      | *    | *       | *  |    |     |     |      | *    |
|                            | Ham  | *           |    |    |     |     | *    | *    |         |    |    |     |     | *    | *    |
|                            | Gmed | *           | *  | *  |     | *   |      | *    | *       | *  | *  |     | *   |      | *    |
|                            | Gmax | *           | *  | *  | *   | *   | *    | *    | *       | *  | *  | *   | *   | *    | *    |
| Normalized IMAT<br>(%)     | RF   |             | *  | *  | *   | *   | *    | *    |         | *  |    | *   | *   | *    | *    |
|                            | PS   | *           |    | *  | *   |     | *    | *    | *       | *  |    | *   |     |      | *    |
|                            | VL   | *           | *  |    |     | *   | *    | *    |         | *  | *  |     | *   | *    | *    |
|                            | Add  | *           | *  |    |     | *   | *    | *    | *       | *  | *  |     | *   | *    | *    |
|                            | Ham  | *           |    | *  | *   |     | *    | *    | *       | *  | *  |     | *   | *    | *    |
|                            | Gmed | *           | *  | *  | *   | *   |      |      |         | *  | *  | *   | *   |      |      |
|                            | Gmax | *           | *  | *  | *   | *   |      |      |         | *  | *  | *   | *   | *    |      |

PS: psoas; GMax: gluteus maximus; GMm: gluteus medius/minimus; VL: vastus lateralis; RF: rectus femoris; Ham: hamstrings; Add: adductor magnus/longus.  
 \* indicates significant difference ( $p < 0.0024$ ).
